# Supplementary material for: Clinical Validation of a Size-Based Microfluidic Device for Circulating Tumor Cell Isolation and Analysis in Renal Cell Carcinoma
Source: MDPI journal article supplement (doi:10.3390/ijms24098404), 2023-05-07

SUPPLEMENT S1. CORRELATION ANALYSIS CHARTS

Correlation analysis for group M0

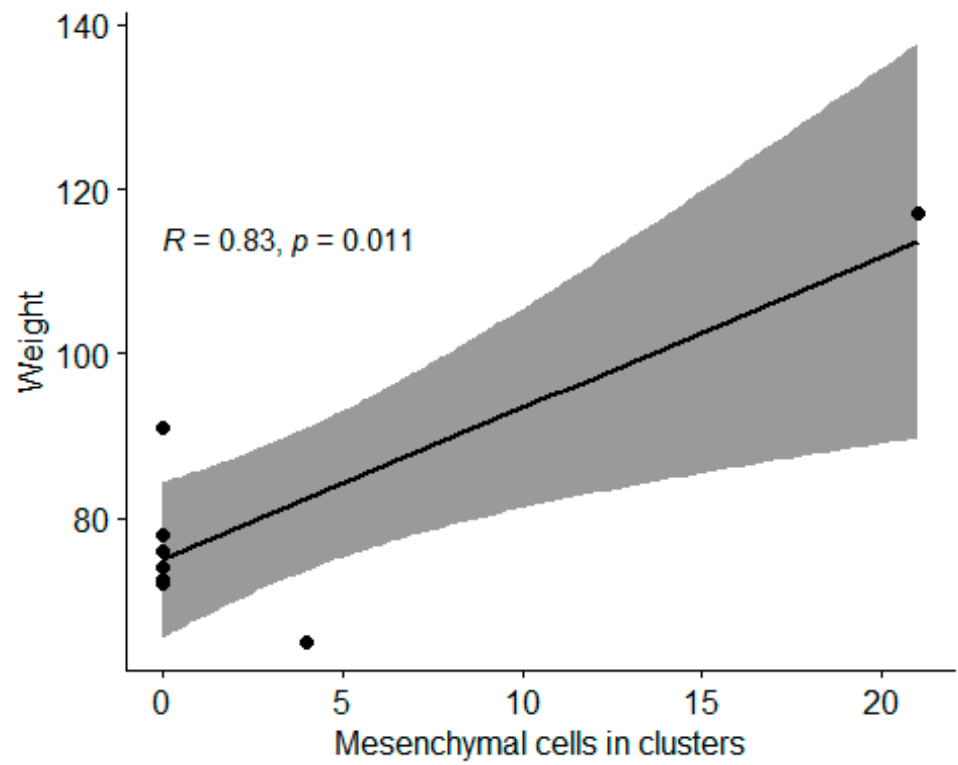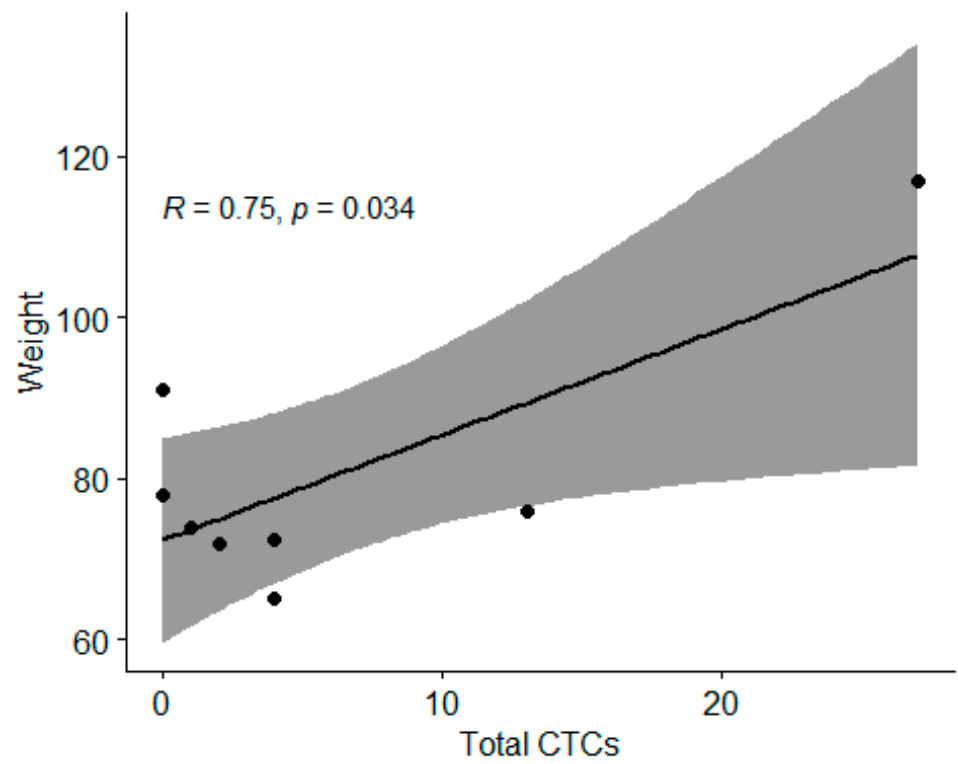

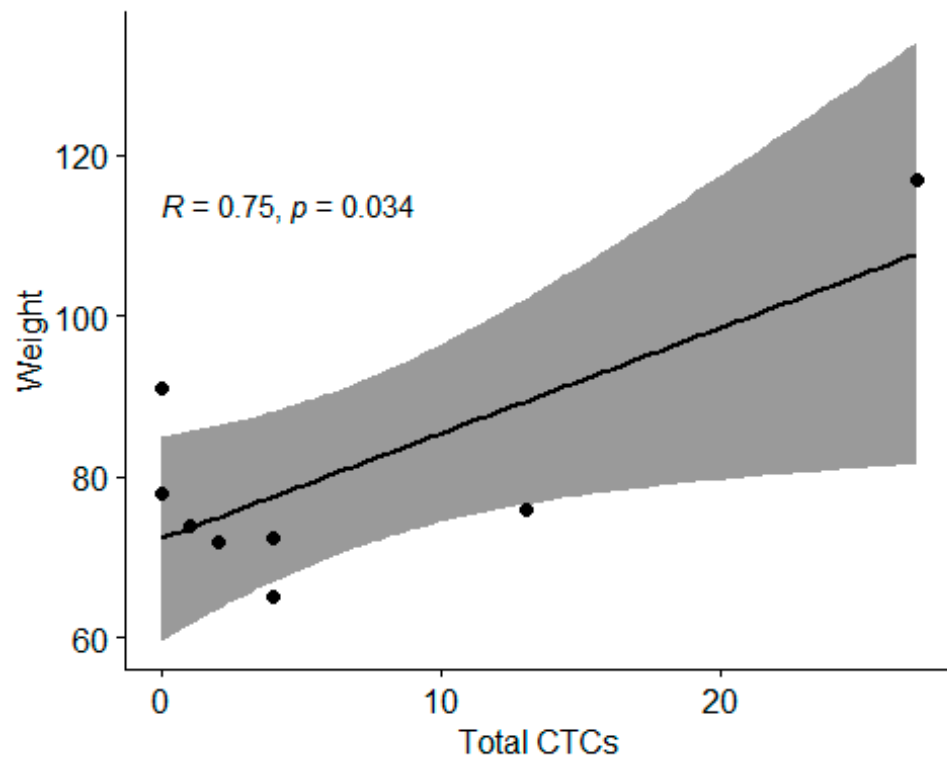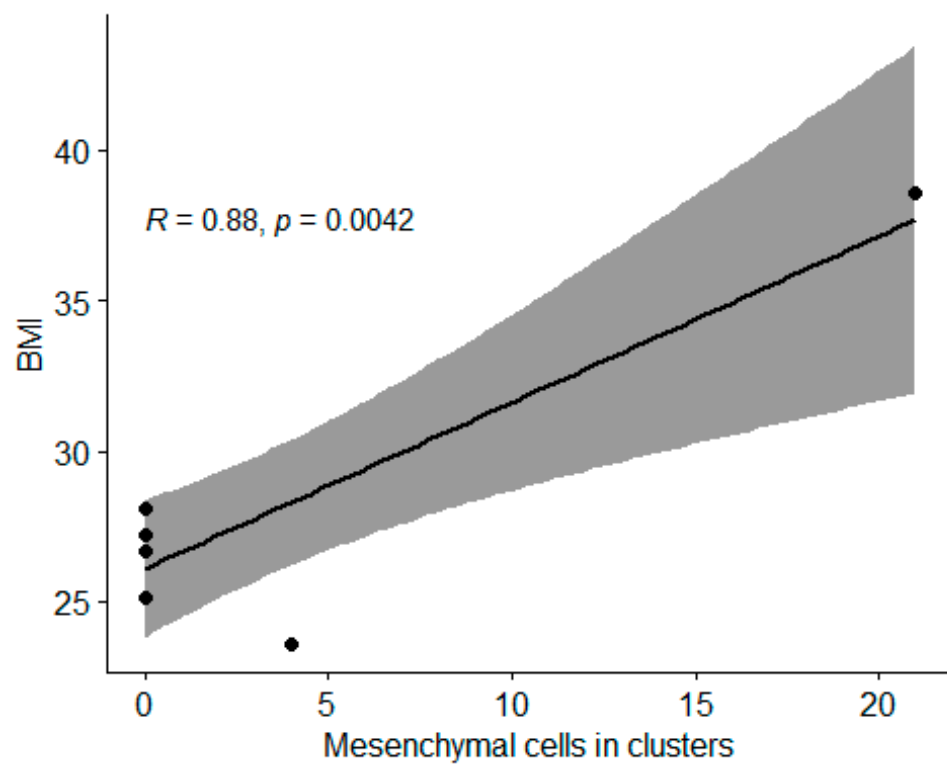

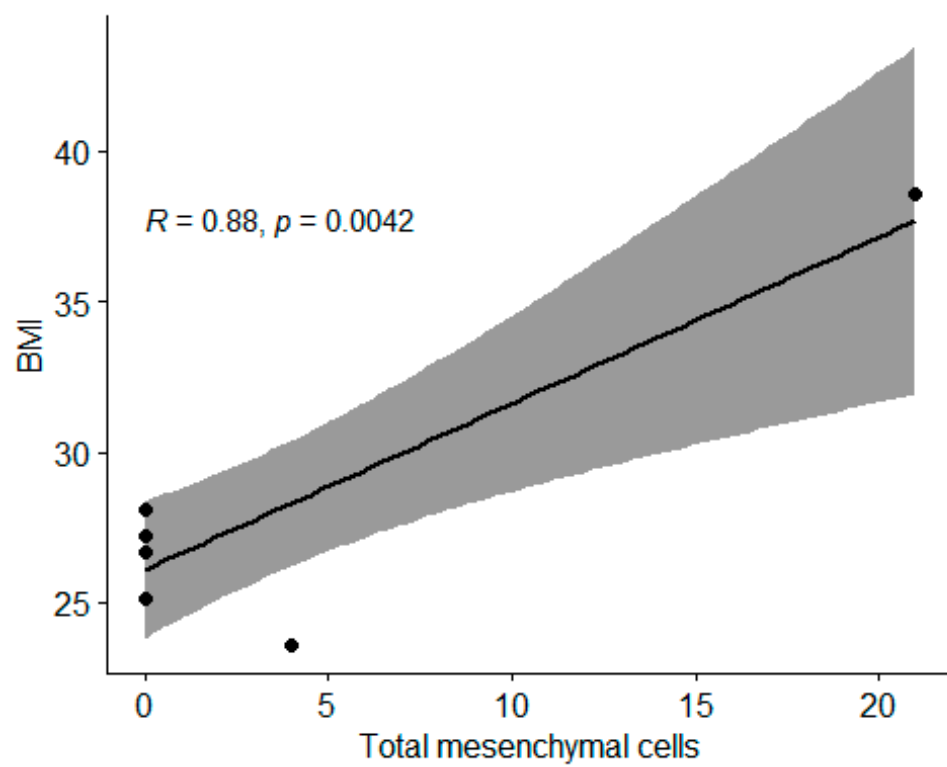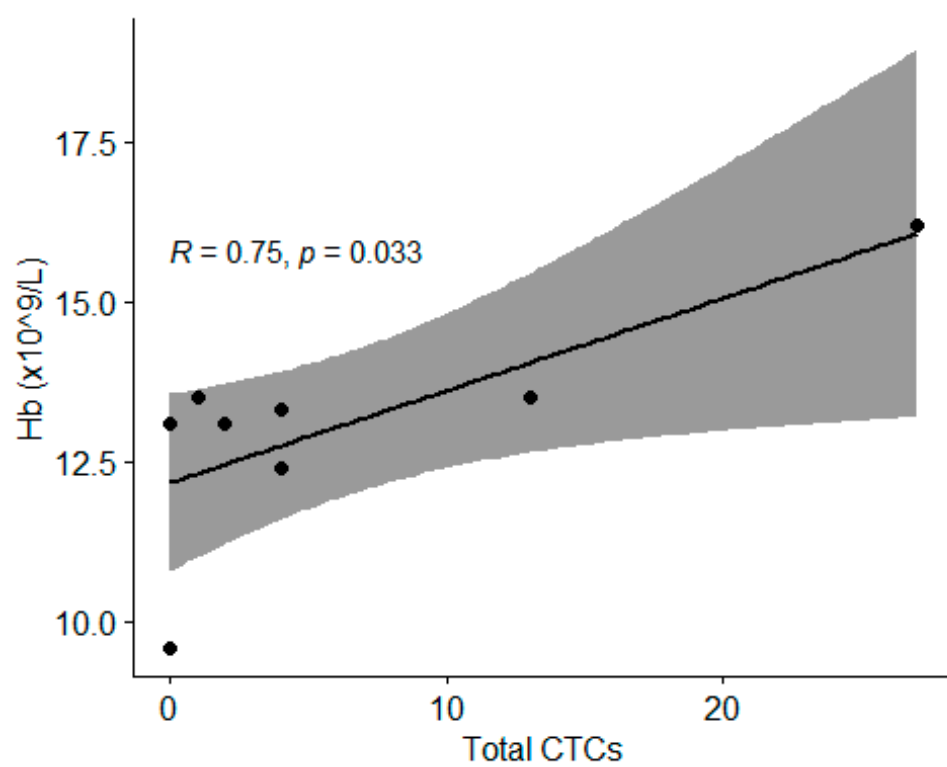

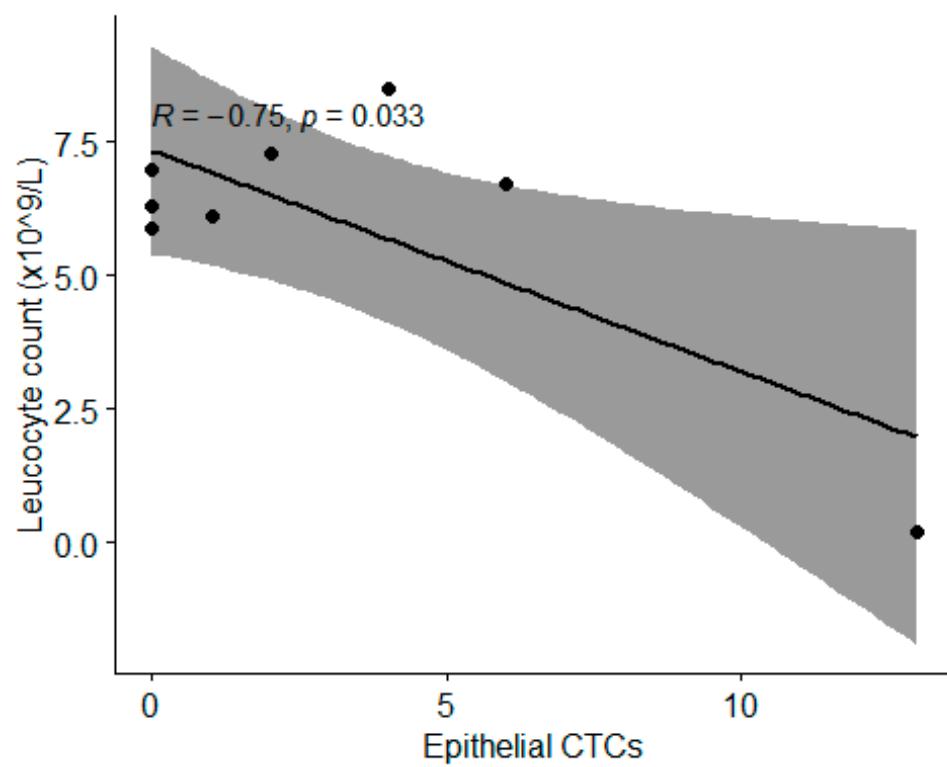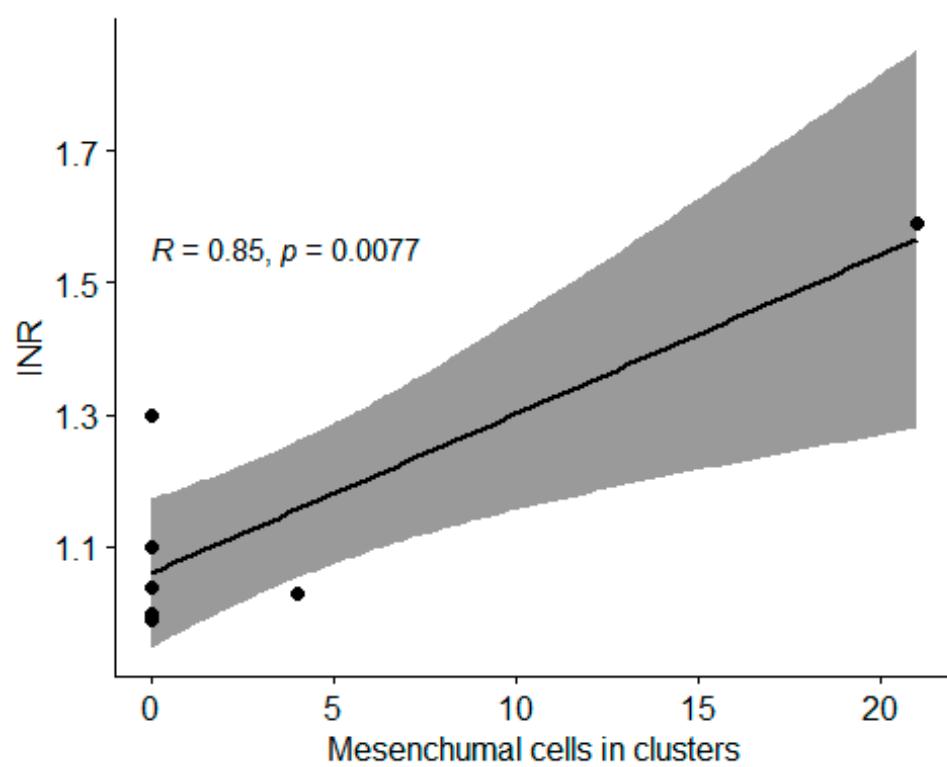

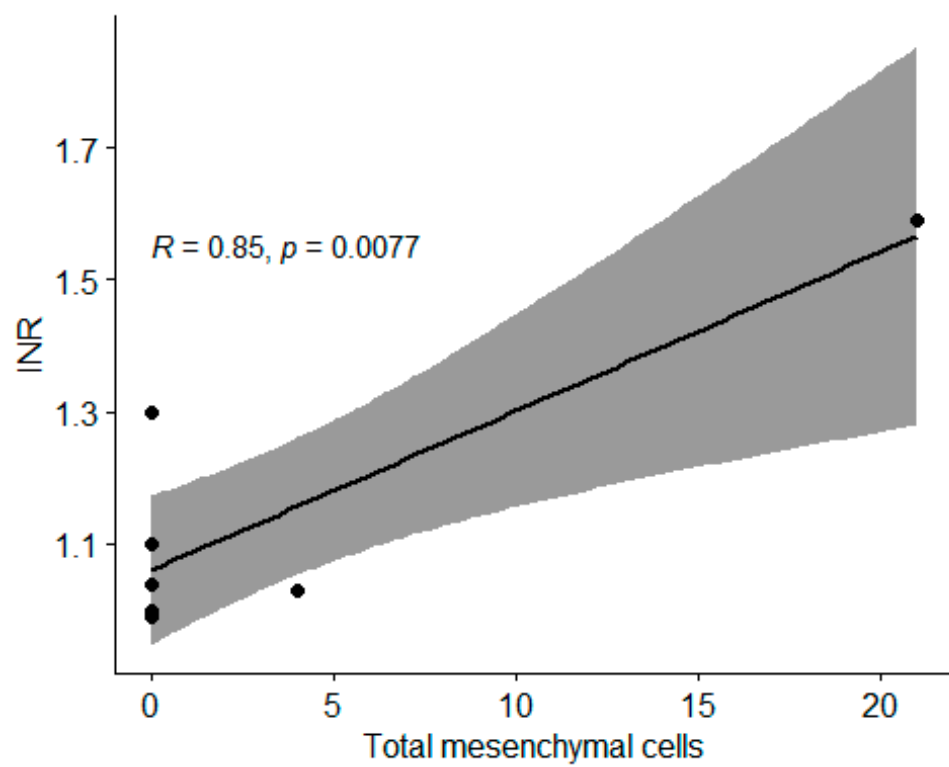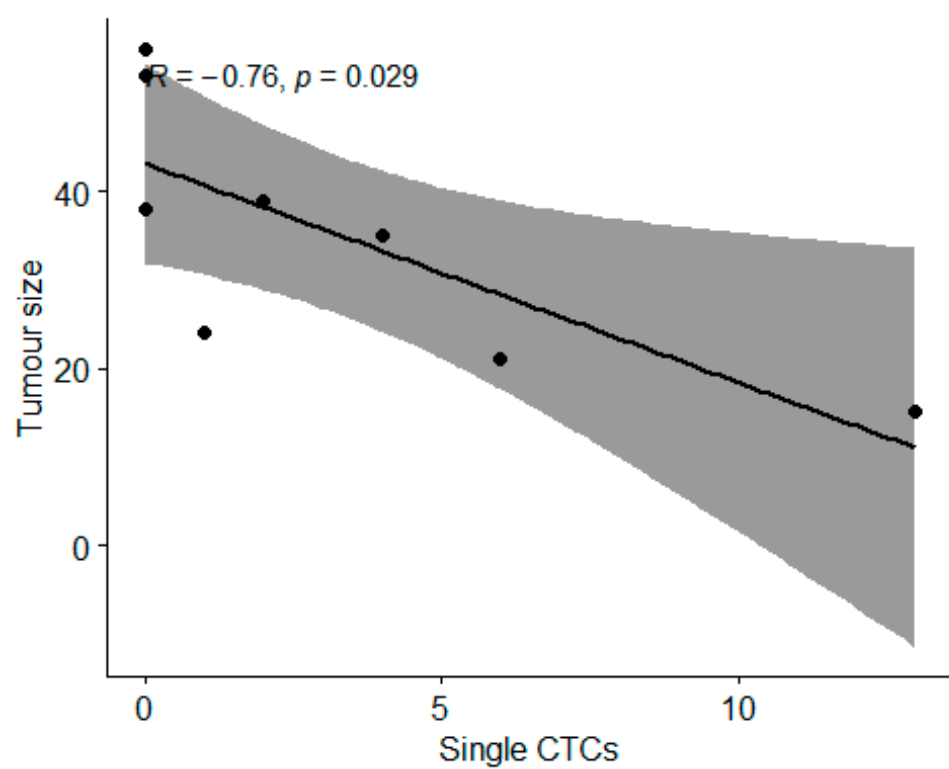

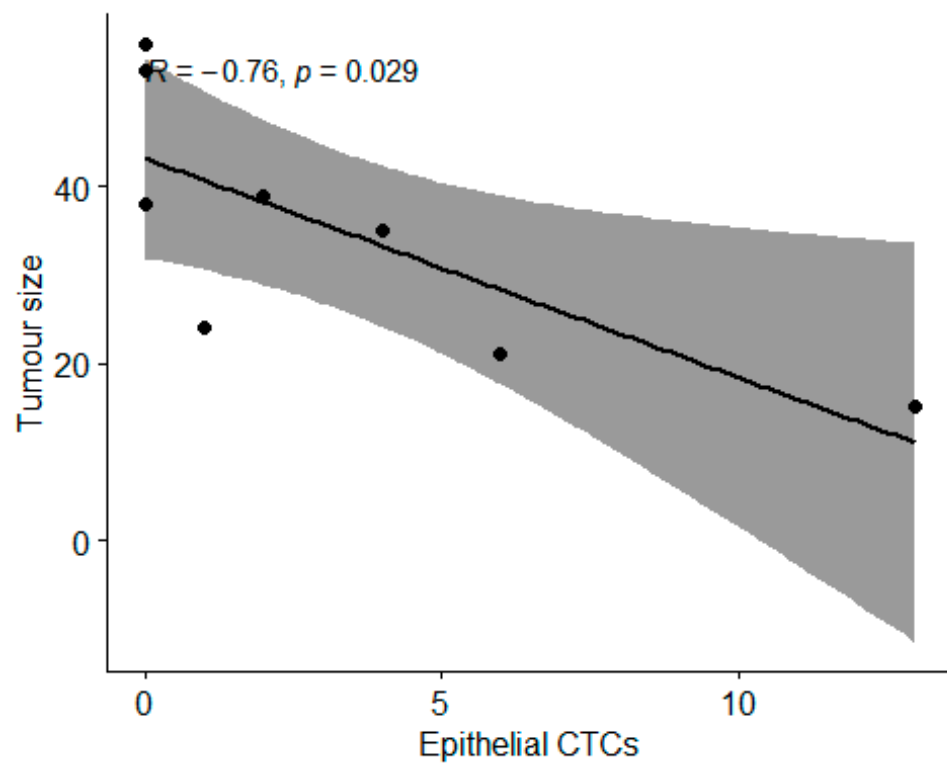

Correlation analysis for group M1

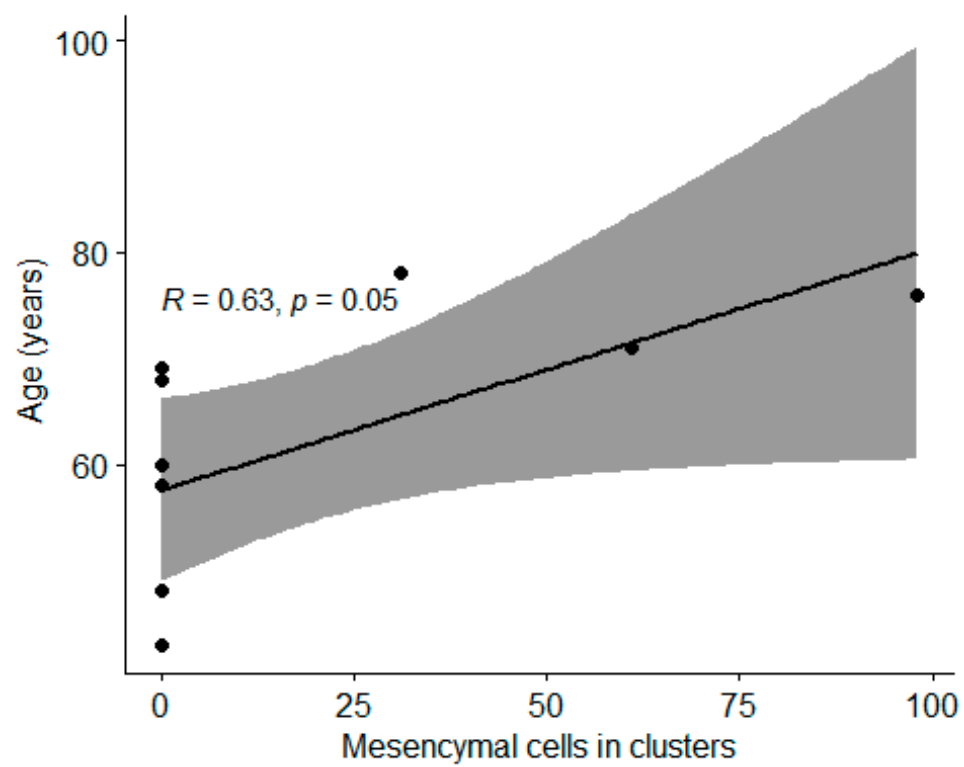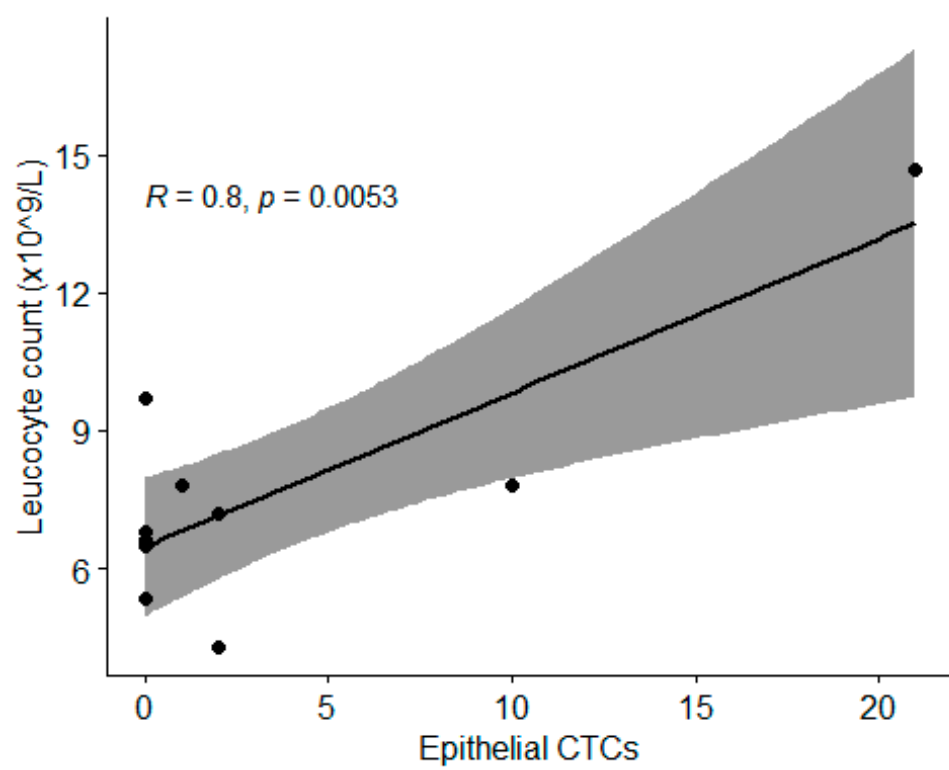

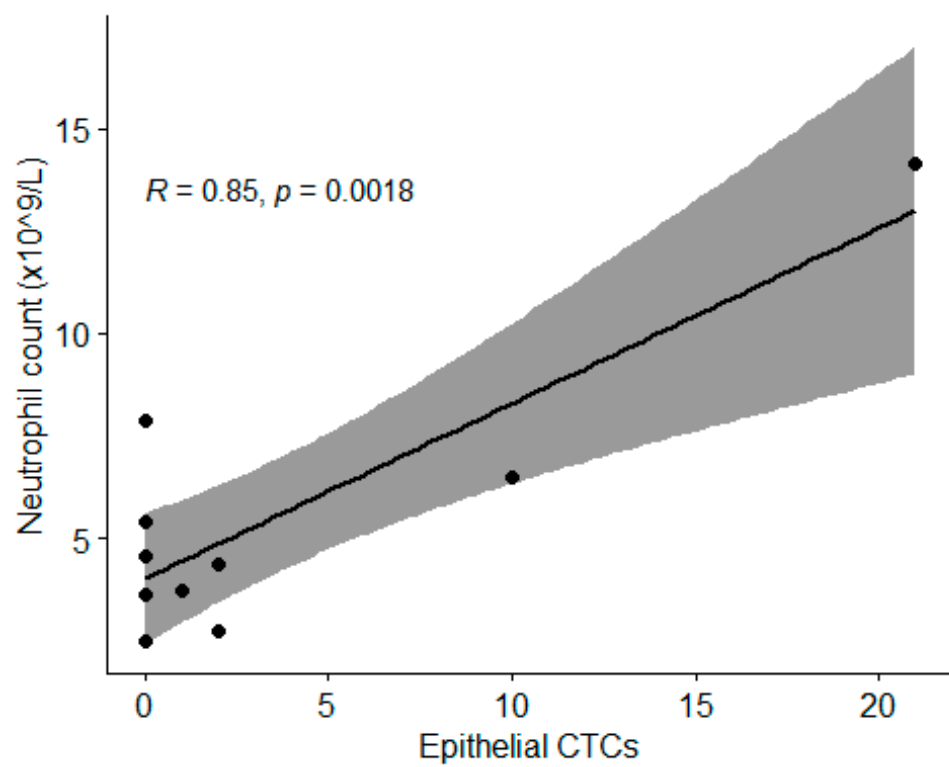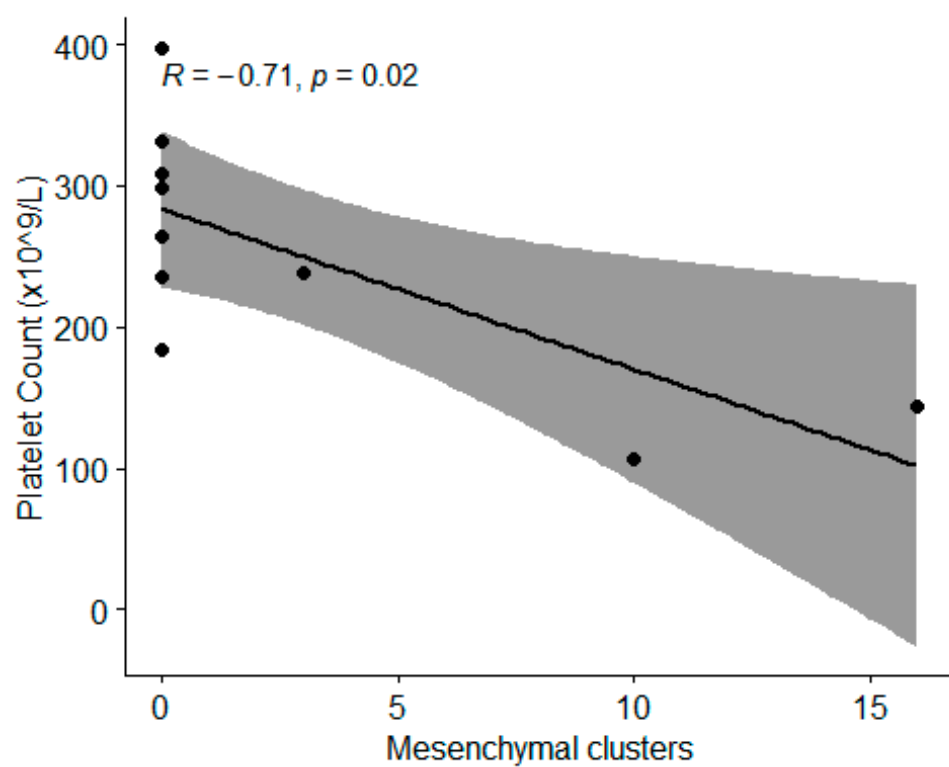



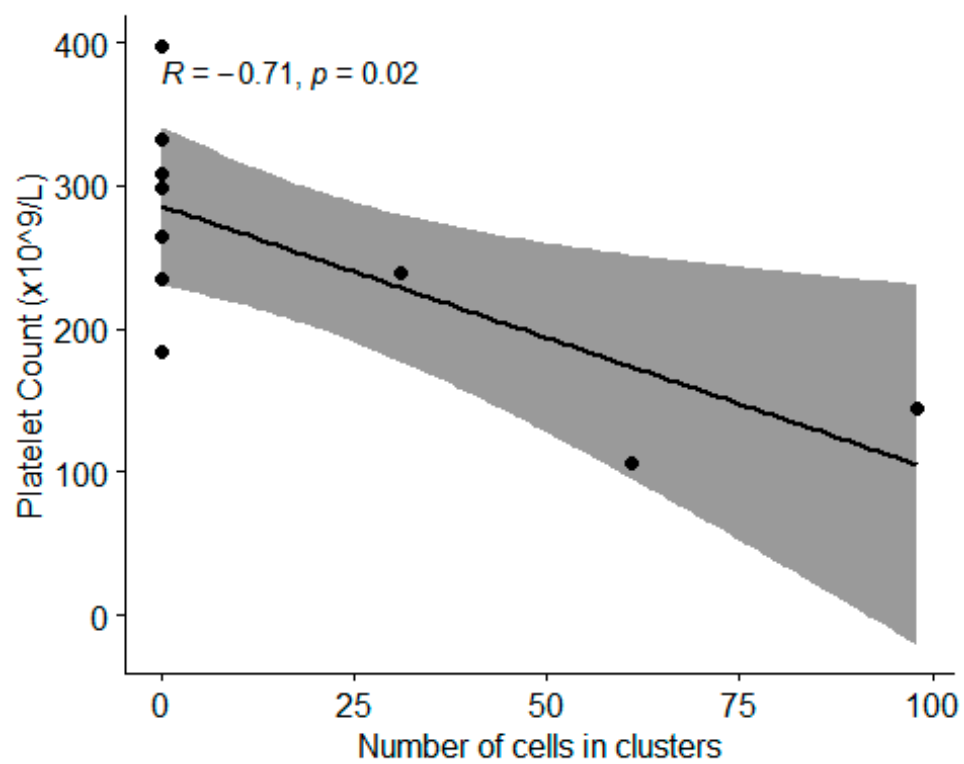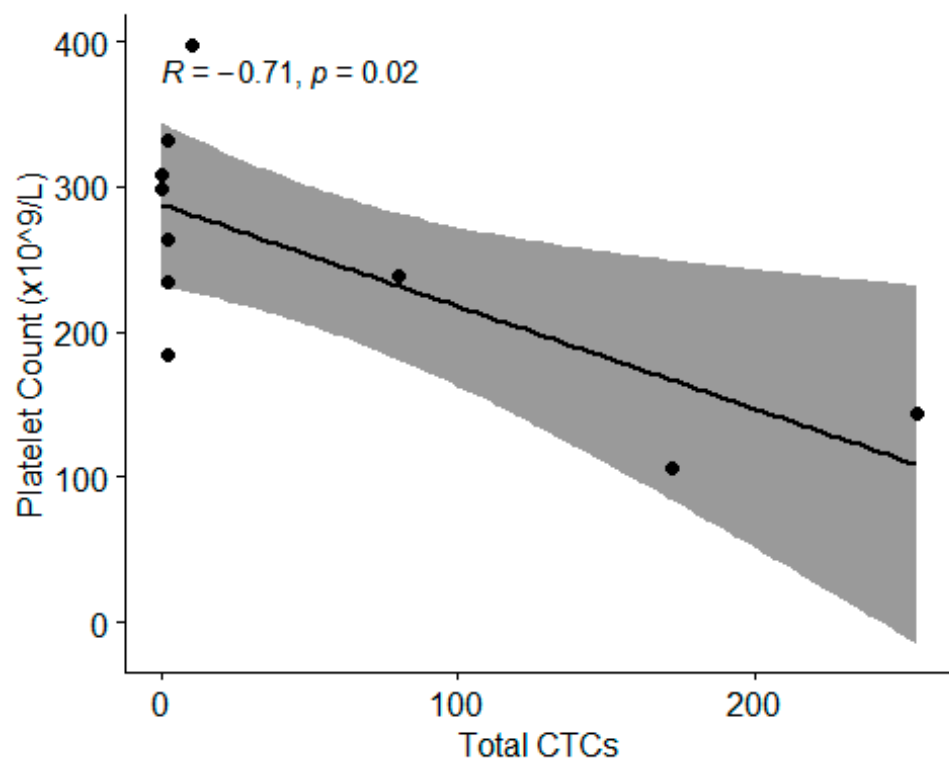

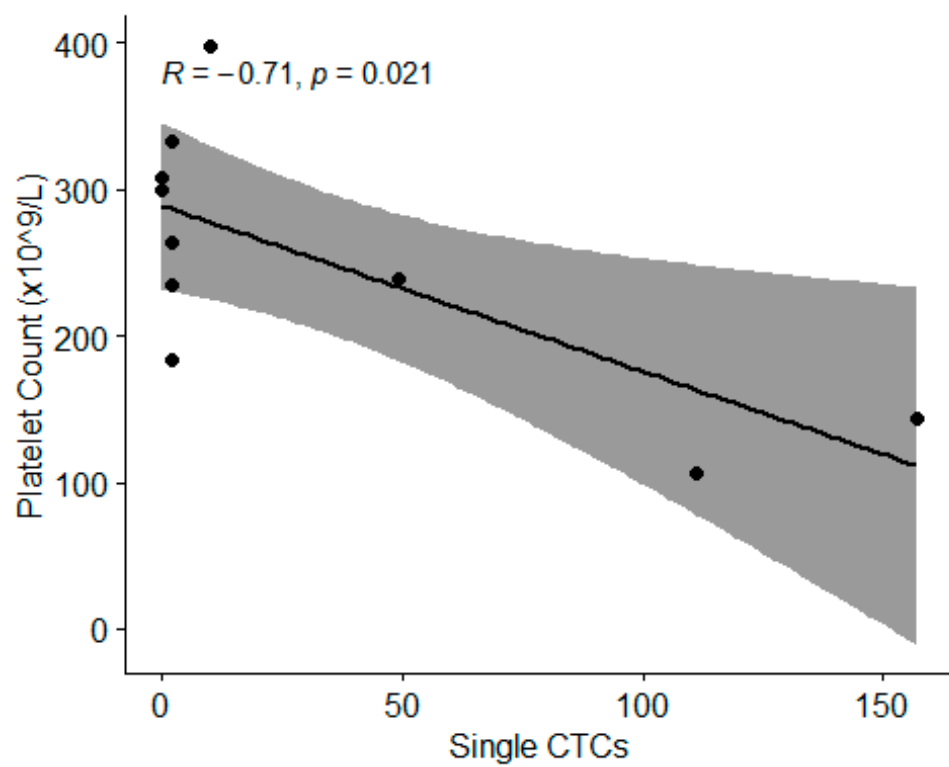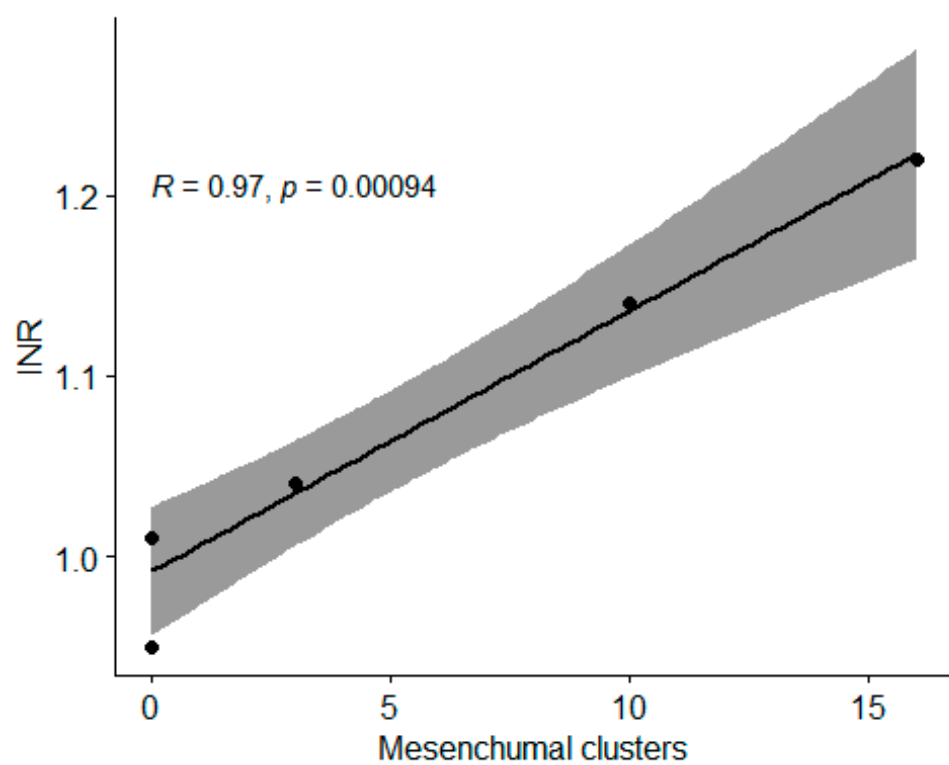

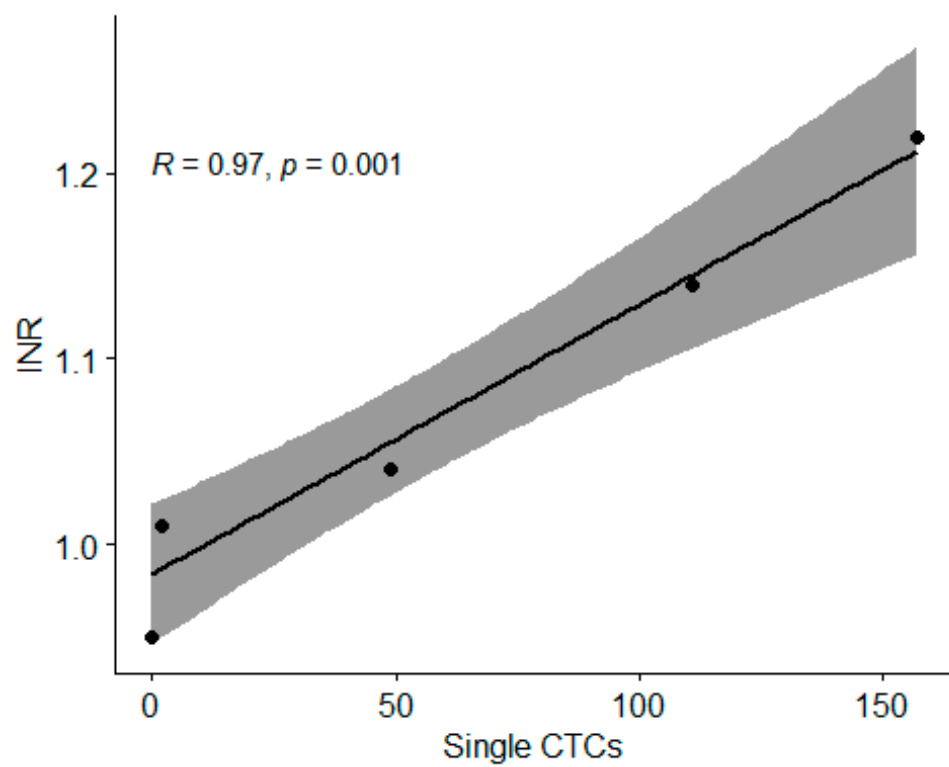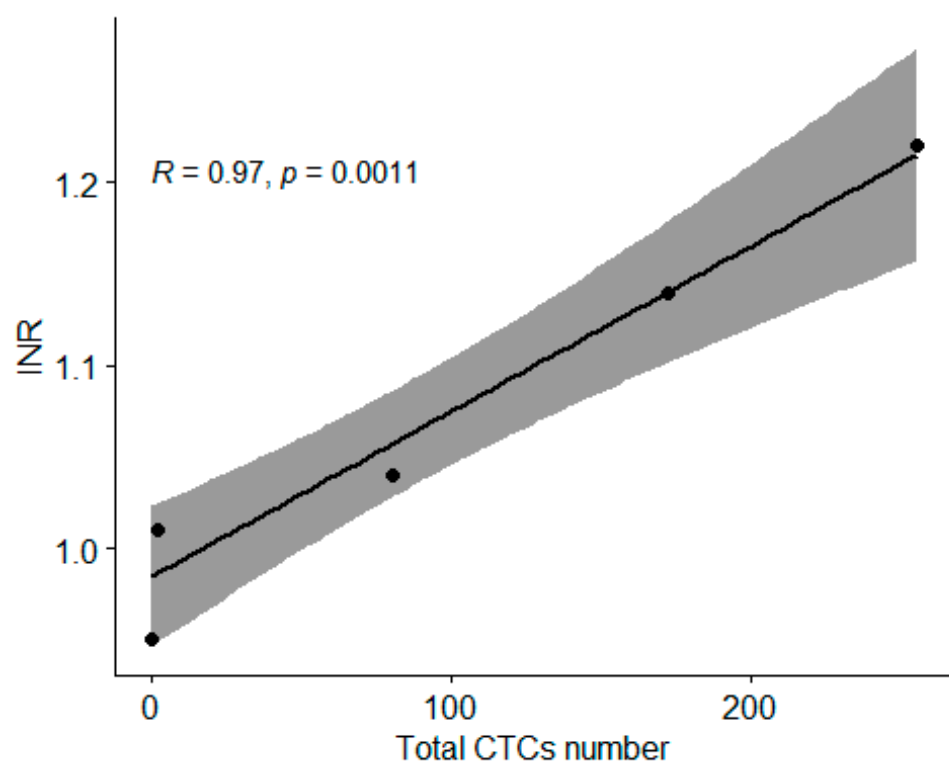

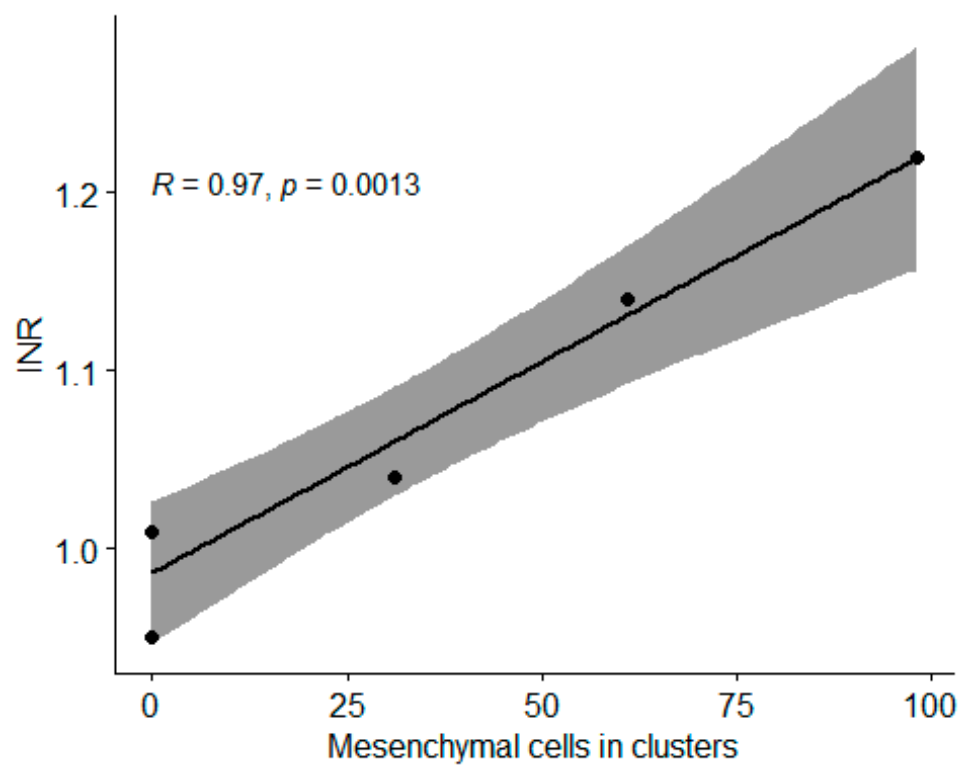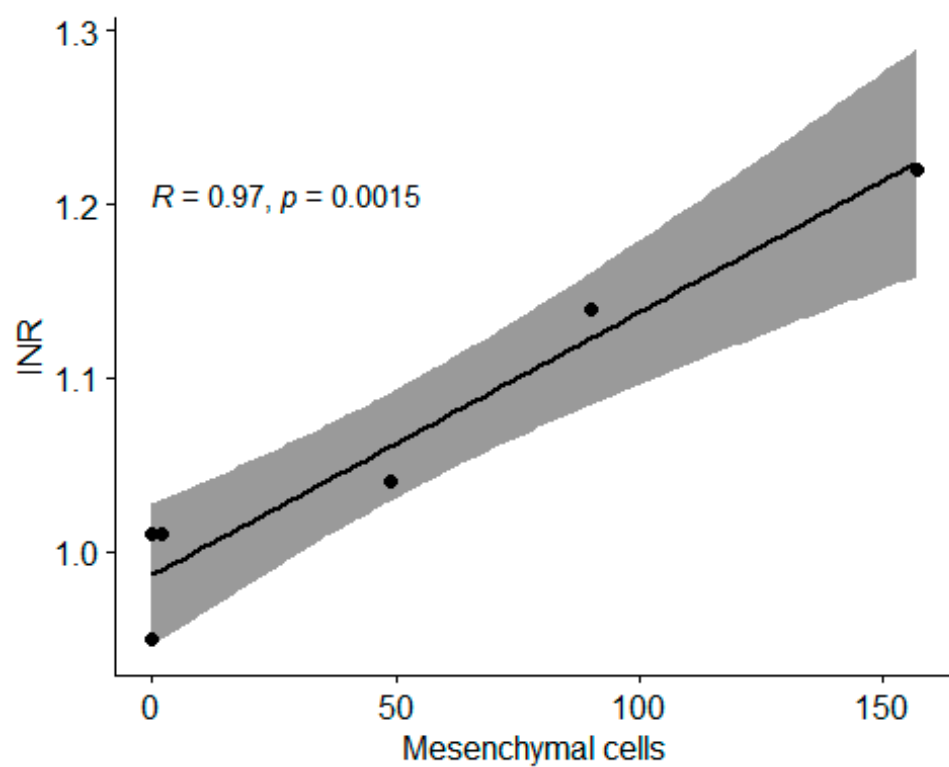

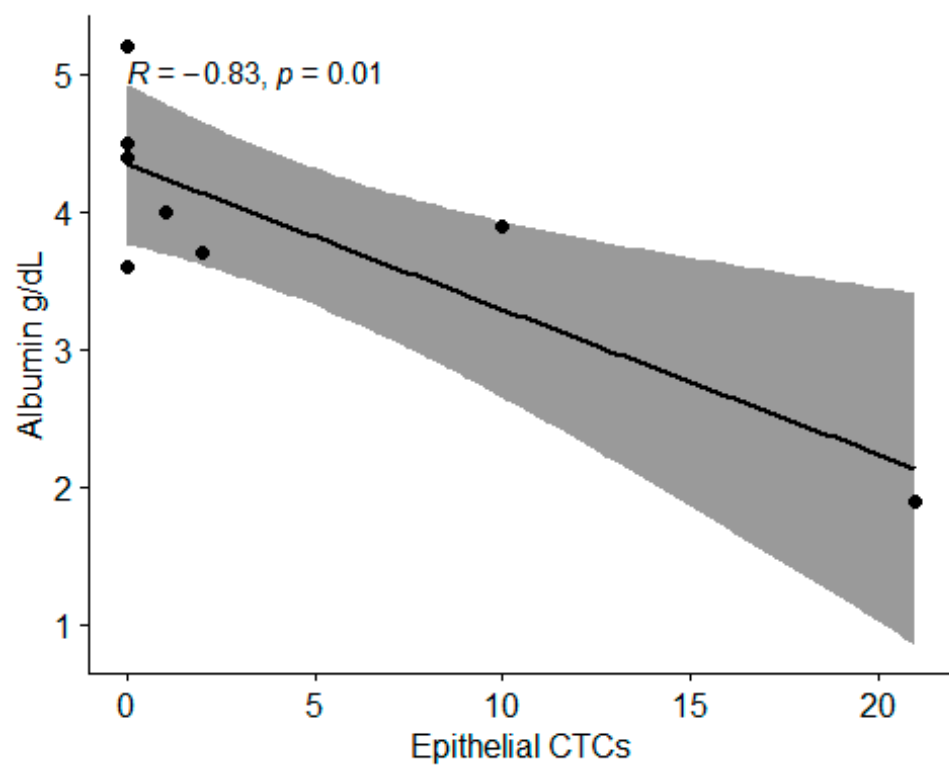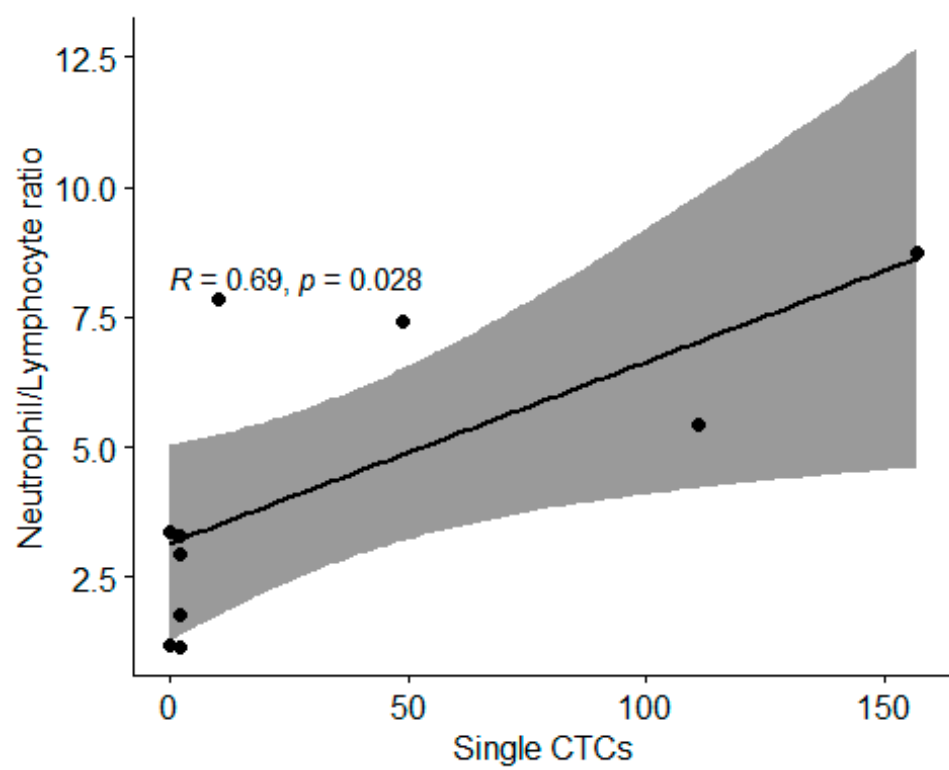

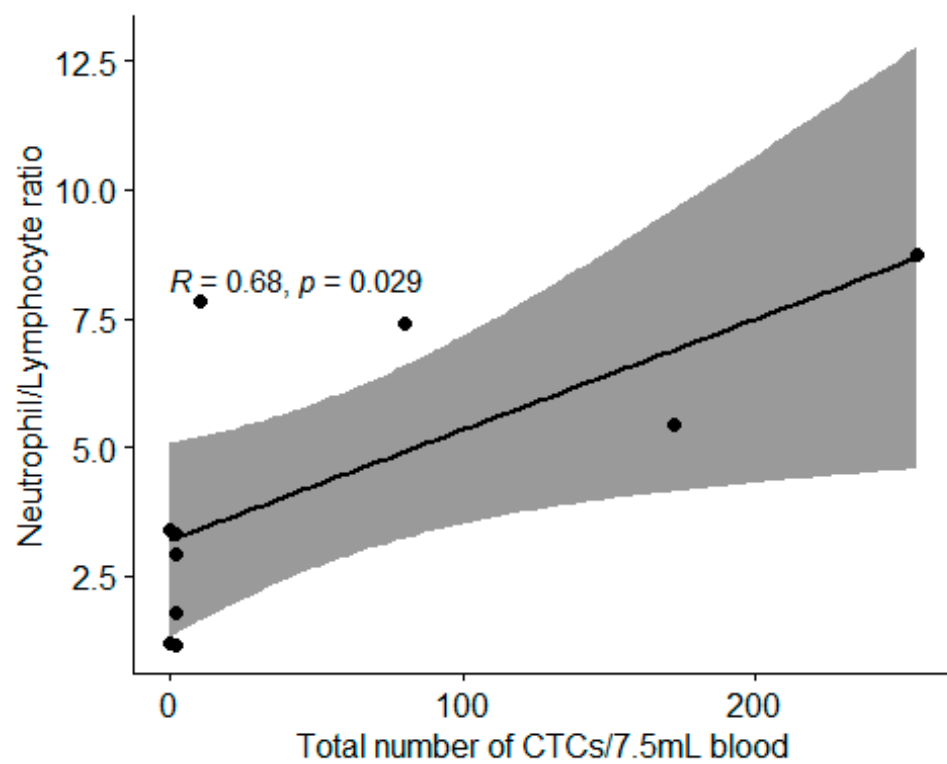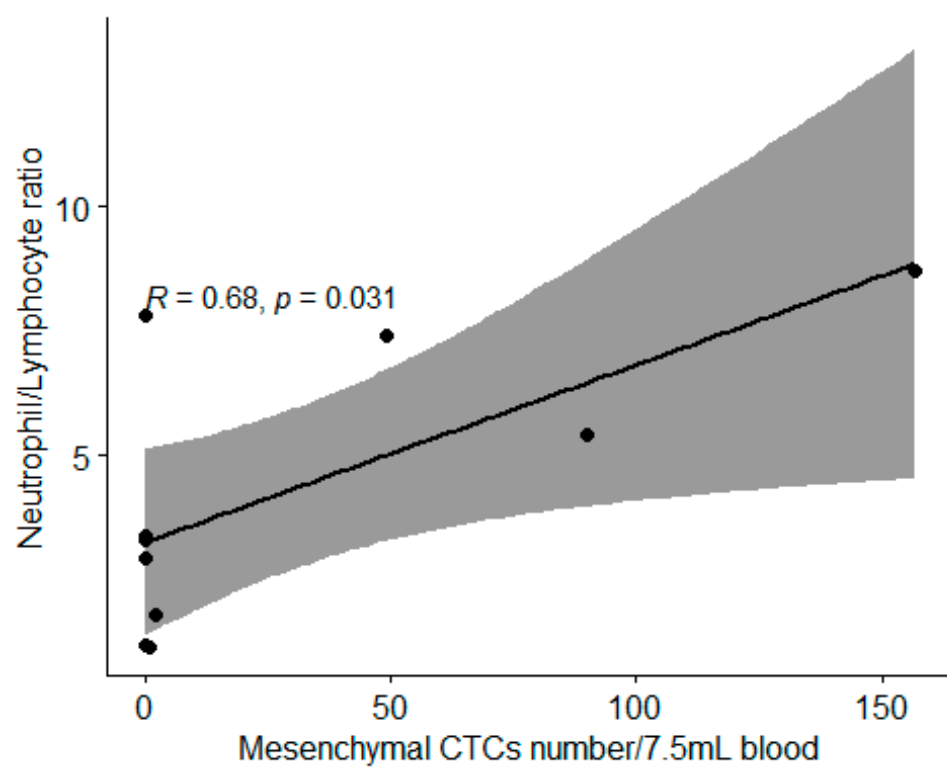

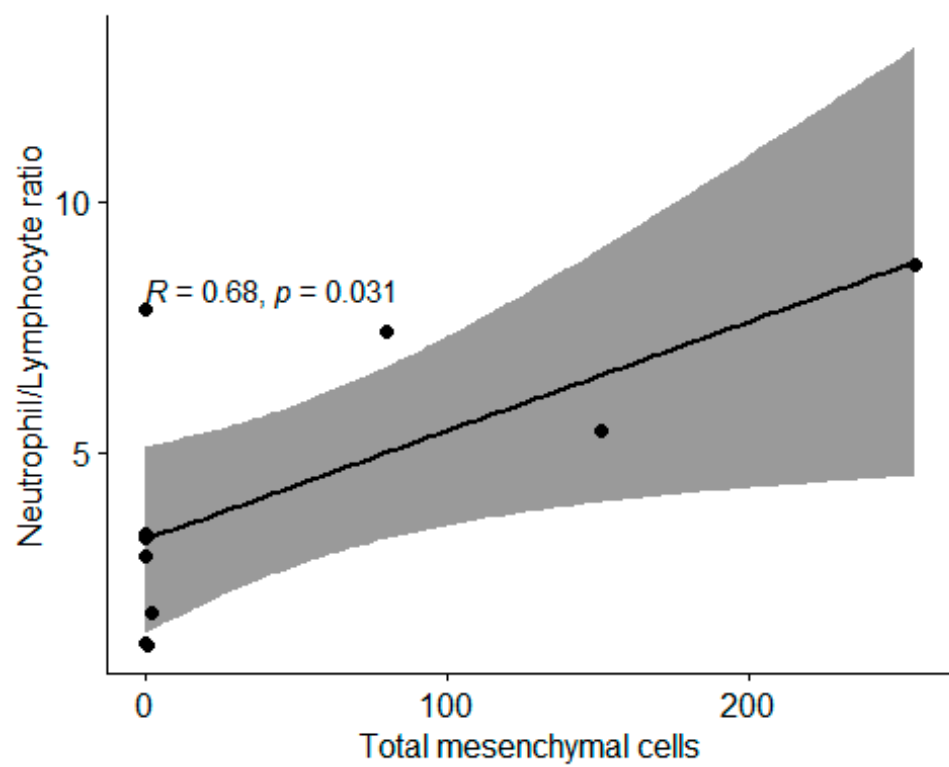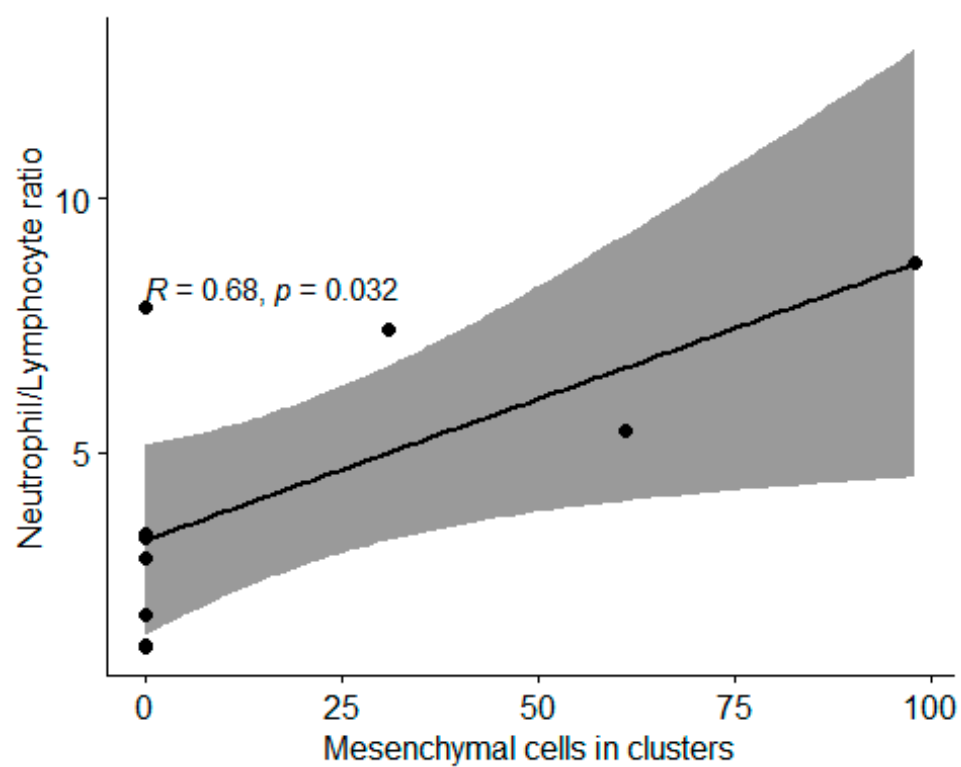

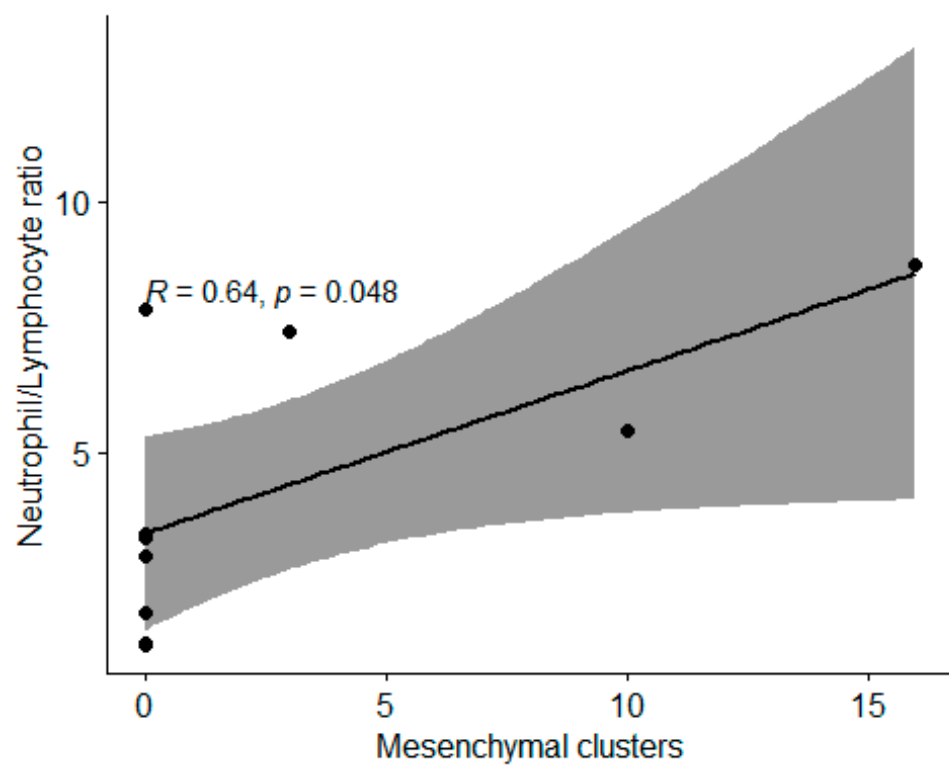

Supplement: s1 [file s1]
